# Supplementary material for: Split-inducing indels in phylogenomic analysis
Source: Springer Nature journal article supplement (doi:10.1186/s13015-018-0130-7), 2018-07-16
Supplement: 13015_2018_130_MOESM1_ESM.pdf [file 13015_2018_130_MOESM1_ESM.pdf]

## Additional file 1

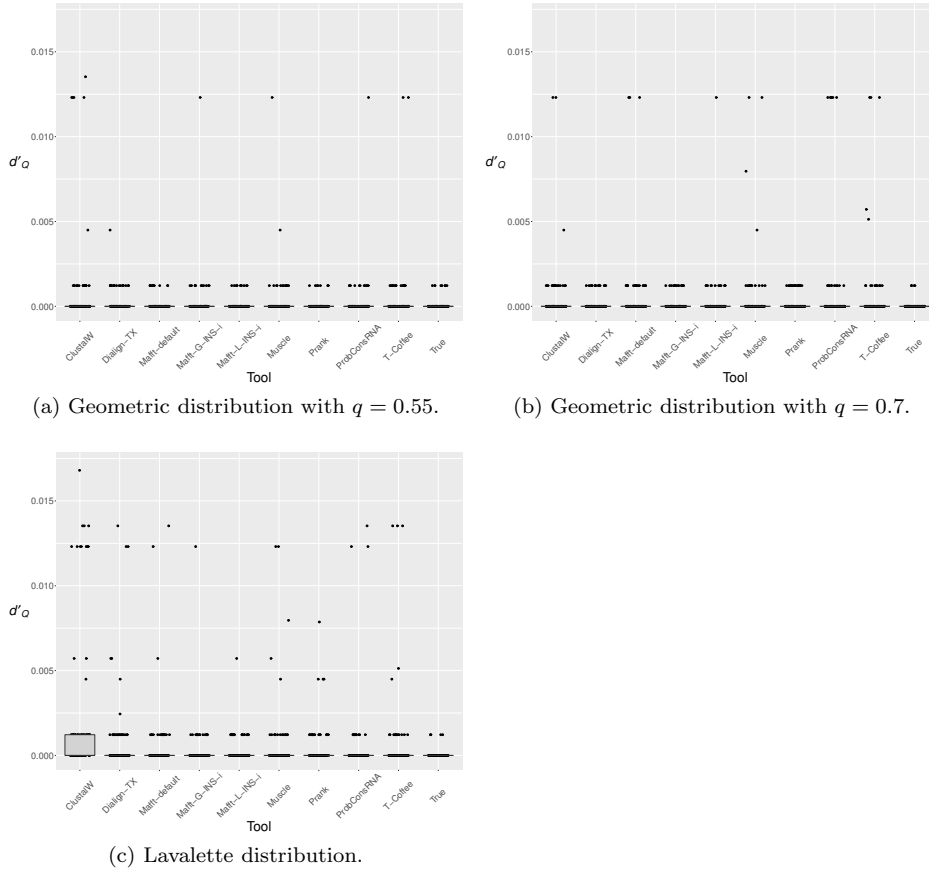

Figure S1: Normalized quartet distances ( $d'_Q$ ) for the data sets simulated with three different indel models and realigned with various methods. True = Scores obtained from trees calculated from the 'true' INDELible alignments. See main text for further details.
